# Supplementary material for: Triethylamine: a potential N-base surrogate for pyridine in Knoevenagel condensation of aromatic aldehydes and malonic acid
Source: Royal Society of Chemistry journal article supplement (doi:10.1039/c5nj03125g), 2016-01-01
Supplement: c5nj03125g1.pdf [file c5nj03125g1.pdf]

## Supporting Information

### Triethylamine: A Potential *N*-Base Surrogate for Pyridine in Knoevenagel Condensation of Aromatic Aldehyde and Malonic Acid

Hitesh S. Pawar<sup>a</sup>, Adhirath S. Wagh<sup>a</sup> and Arvind M. Lali<sup>\*a,b</sup>

<sup>a</sup> DBT-ICT Centre for Energy Biosciences, Institute of Chemical Technology, N.P.Marg Matunga (w), Matunga, Mumbai, India. Fax: 91 22 3361 1020; Tel: 91 22 3361 1111(Extn. 2301); E-mail: [hiteshudct@gmail.com](mailto:hiteshudct@gmail.com)

<sup>a,b\*</sup> Department of Chemical engineering, Institute of Chemical Technology, N.P.Marg Matunga (w), Matunga, Mumbai, India. Fax: 91 22 3361 1020; Tel: 91 22 3361 1111(Extn. 2301); E-mail: [arvindmlali@gmail.com](mailto:arvindmlali@gmail.com)

#### 1. FTIR spectra of synthesized cinnamic acids

##### 1.1 FTIR of compound 3a

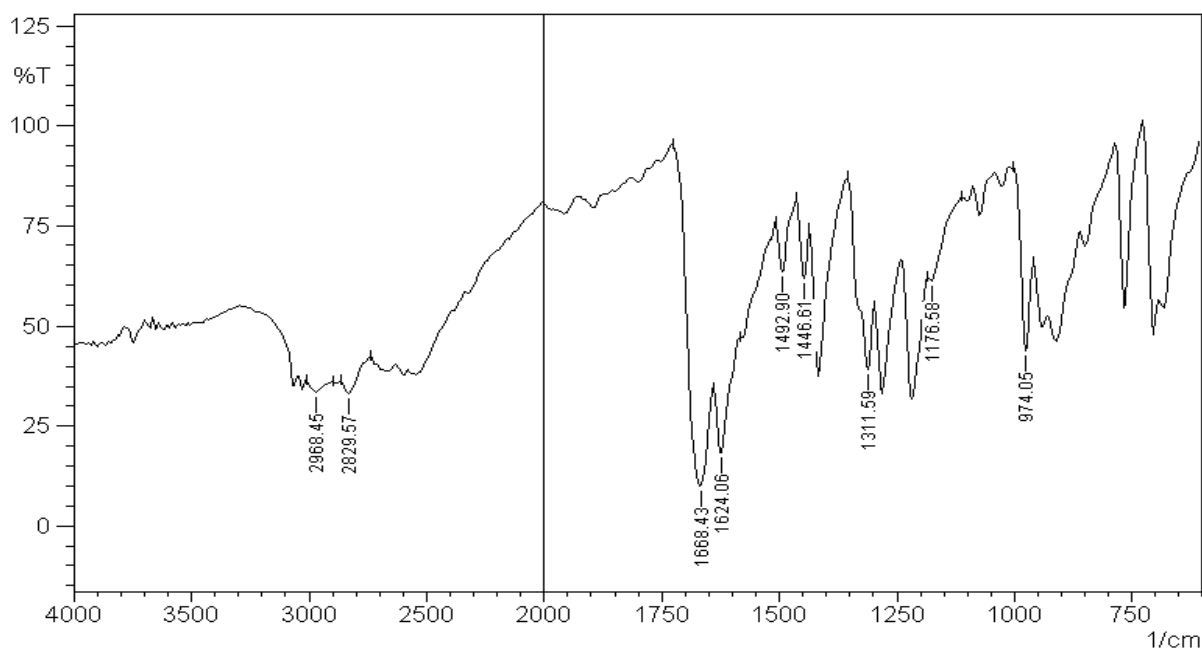

Figure S1. ATR-FTIR of compound 3a

## 1.2 FITR of compound 3b

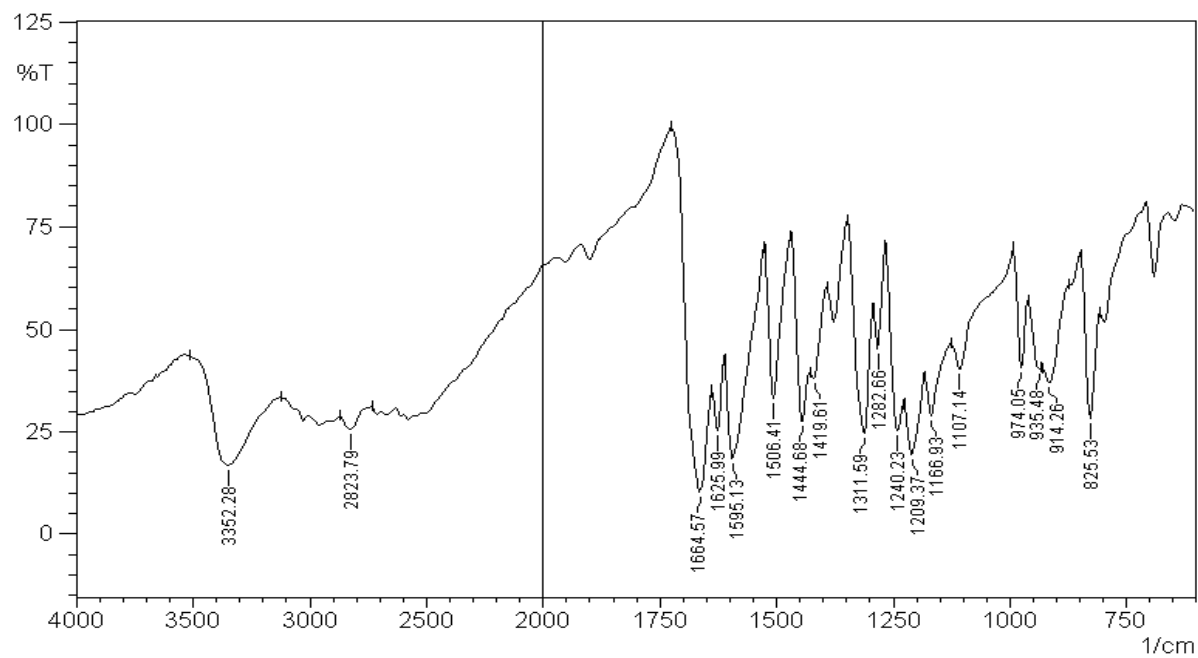

Figure S2. ATR-FTIR of compound 3b

## 1.3 FITR of compound 3c

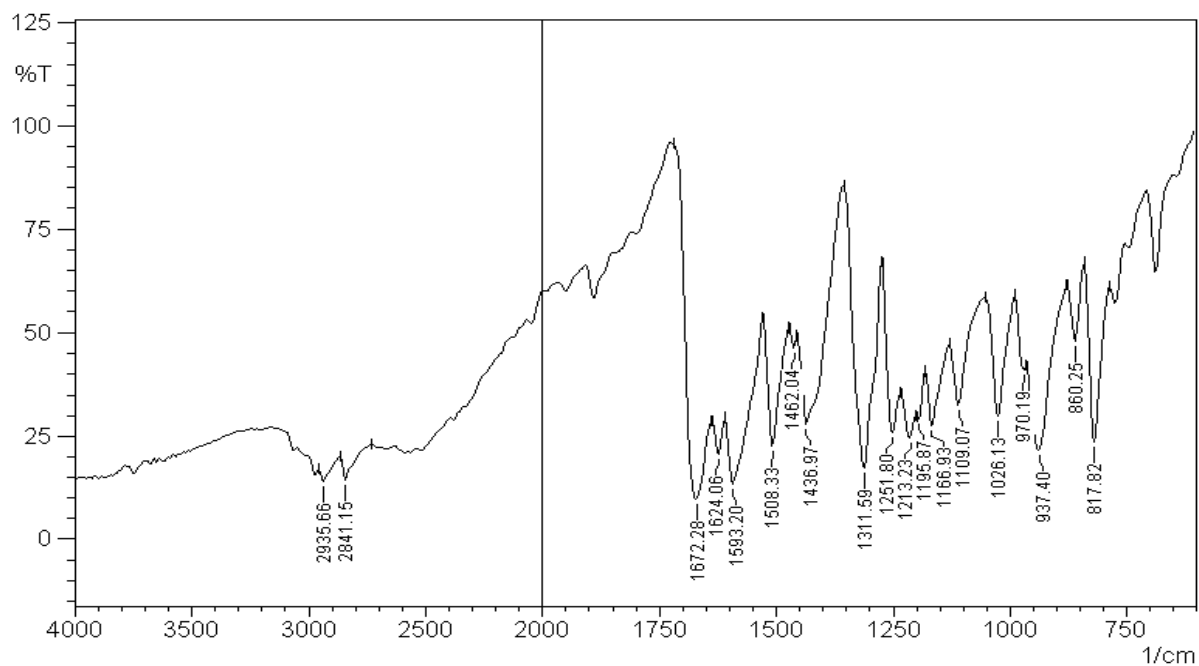

Figure S3. ATR-FTIR of compound 3c

### 1.4 FITR of compound 3d

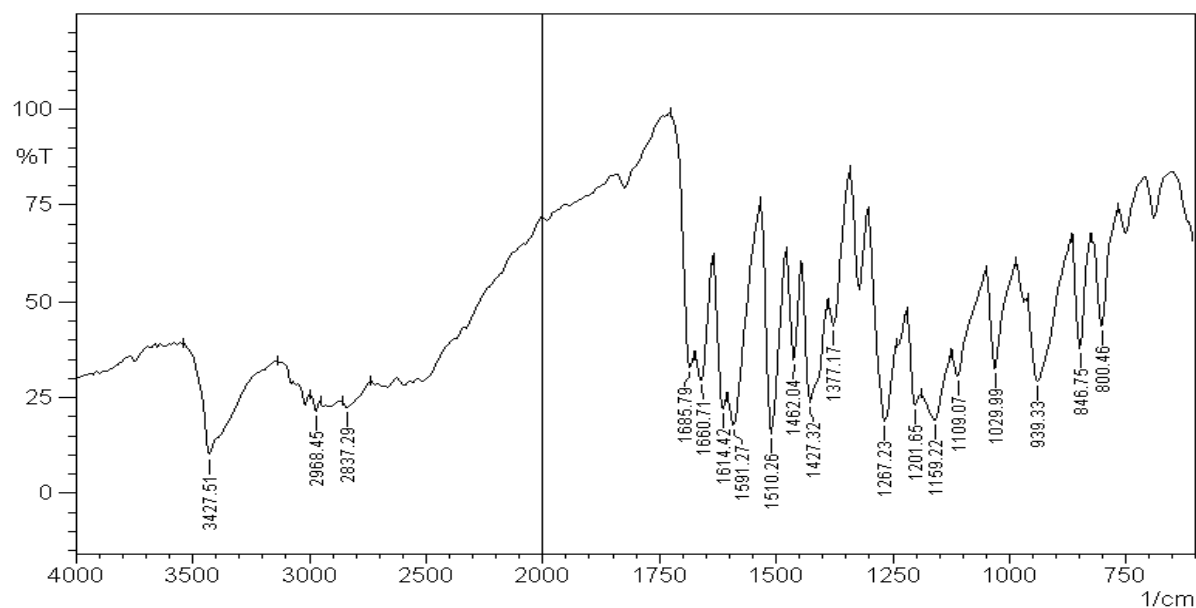

Figure S4. ATR-FTIR of compound 3d

### 1.5 FITR of compound 3e

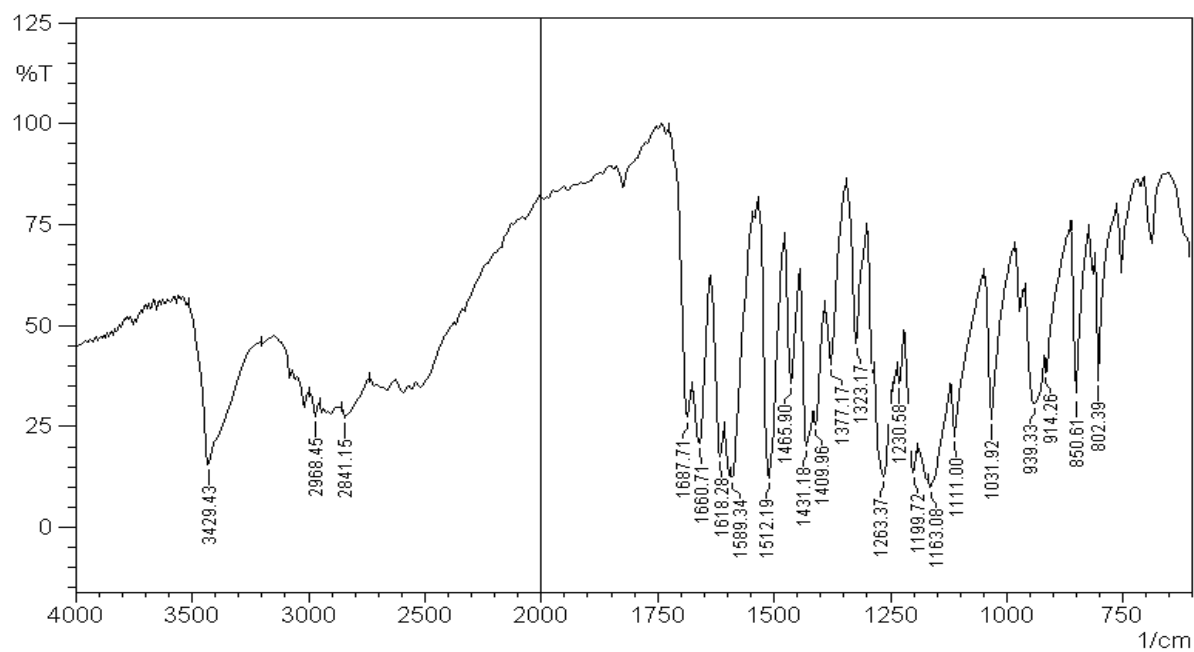

Figure S5. ATR-FTIR of compound 3e

### 1.6 FITR of compound 3f

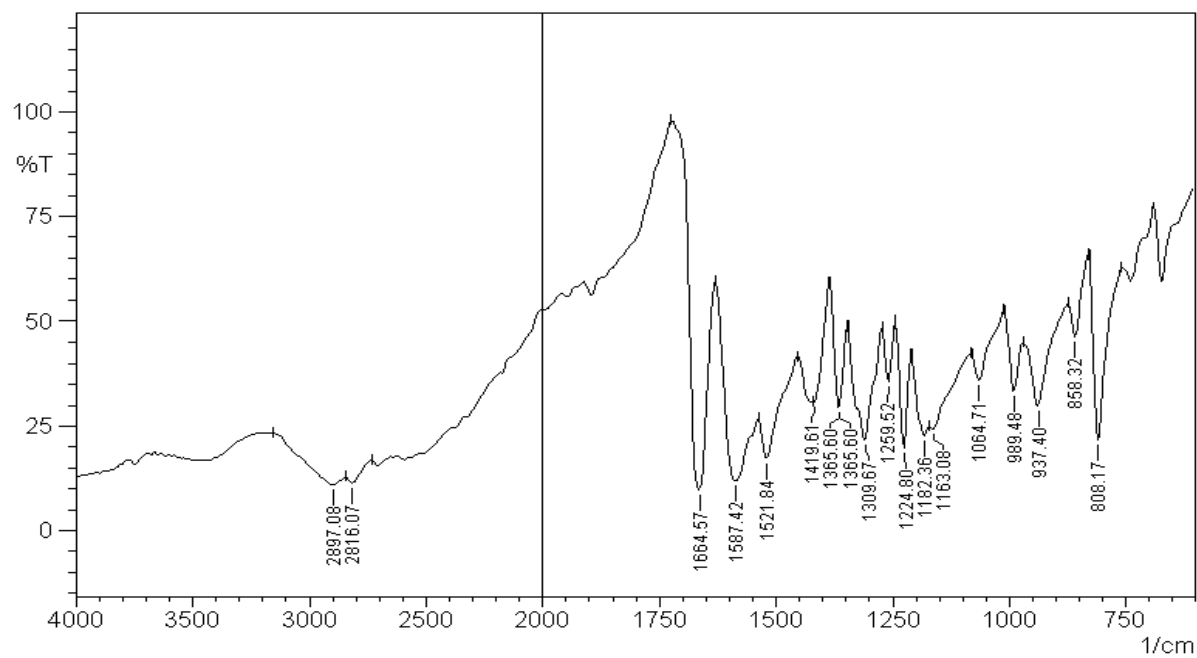

Figure S6. ATR-FTIR of compound 3f

### 1.7 FITR of compound 3g

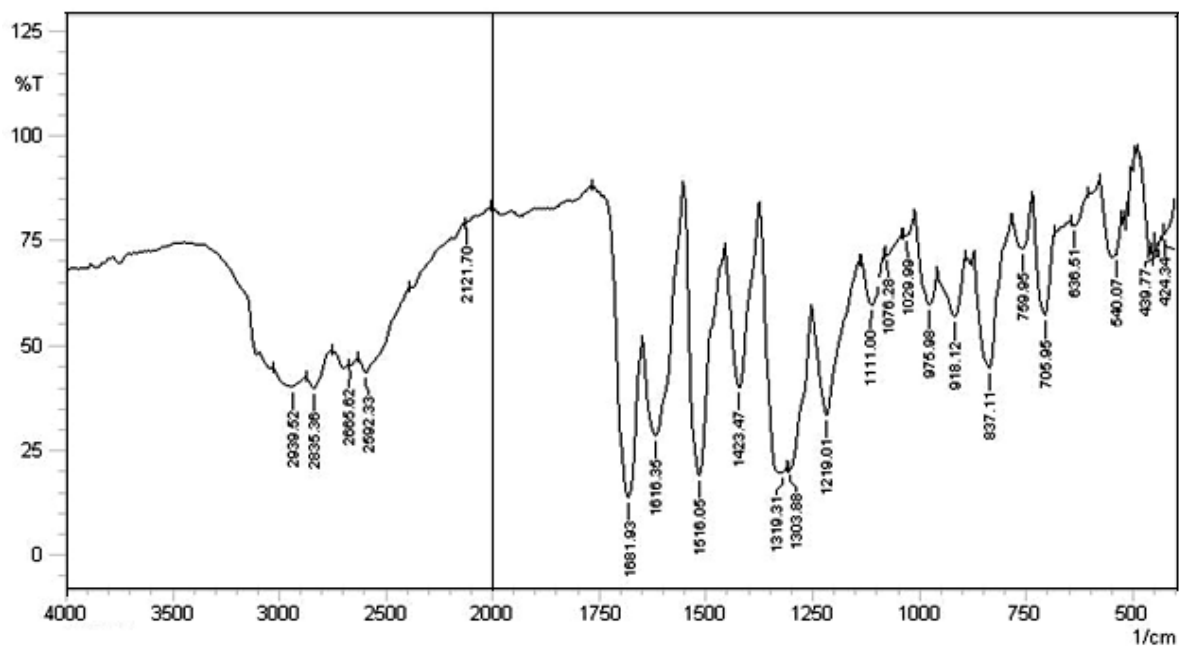

Figure S7. ATR-FTIR of compound 3g

## 1.8 FTIR of compound 3h

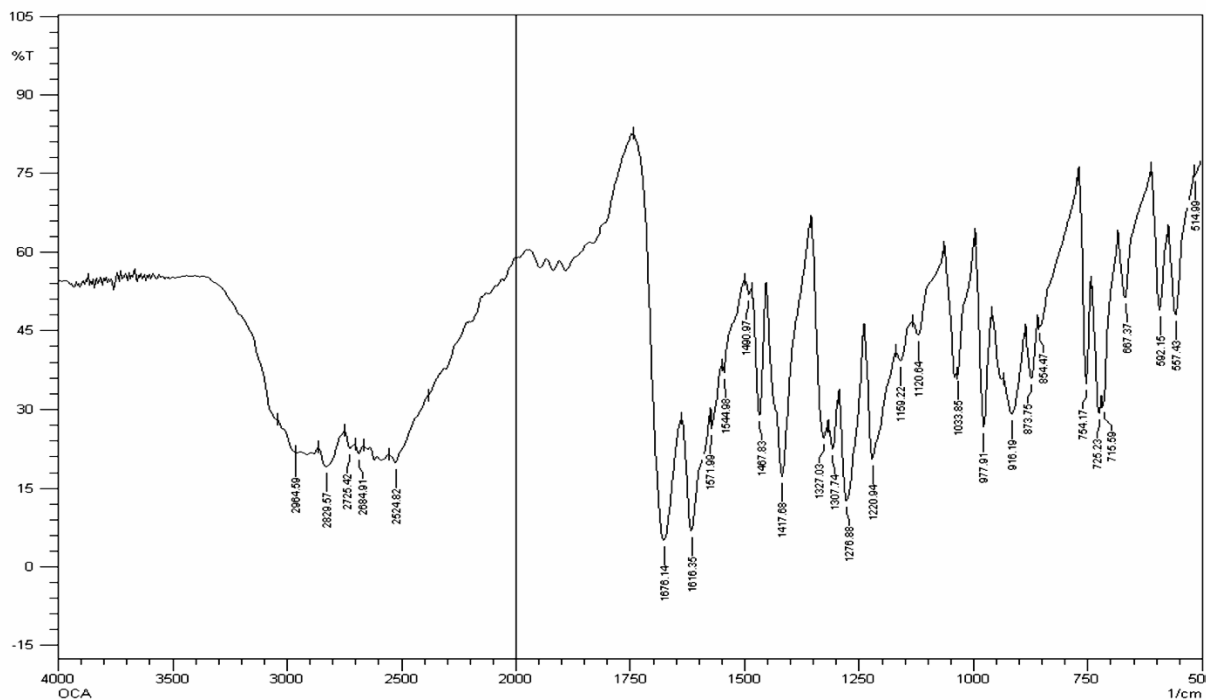

Figure S8. ATR-FTIR of compound 3h

## 2. LC MS analysis of synthesized compounds

### 2.1 LC MS of compound 3a

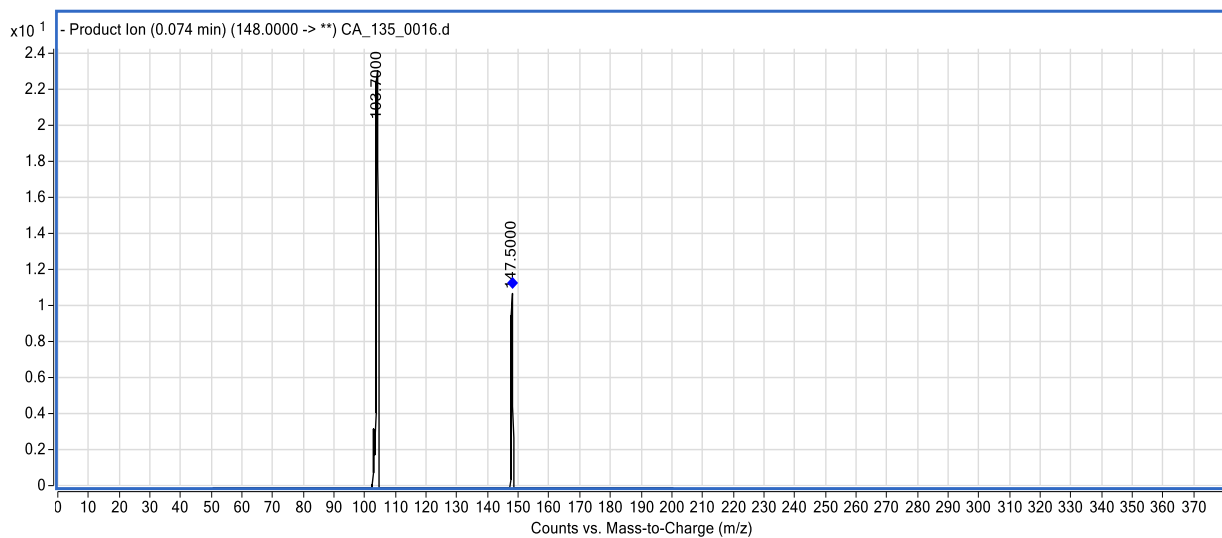

Figure S9. LC MS chromatogram of compound 3a

## 2.2 LC MS of compound 3b

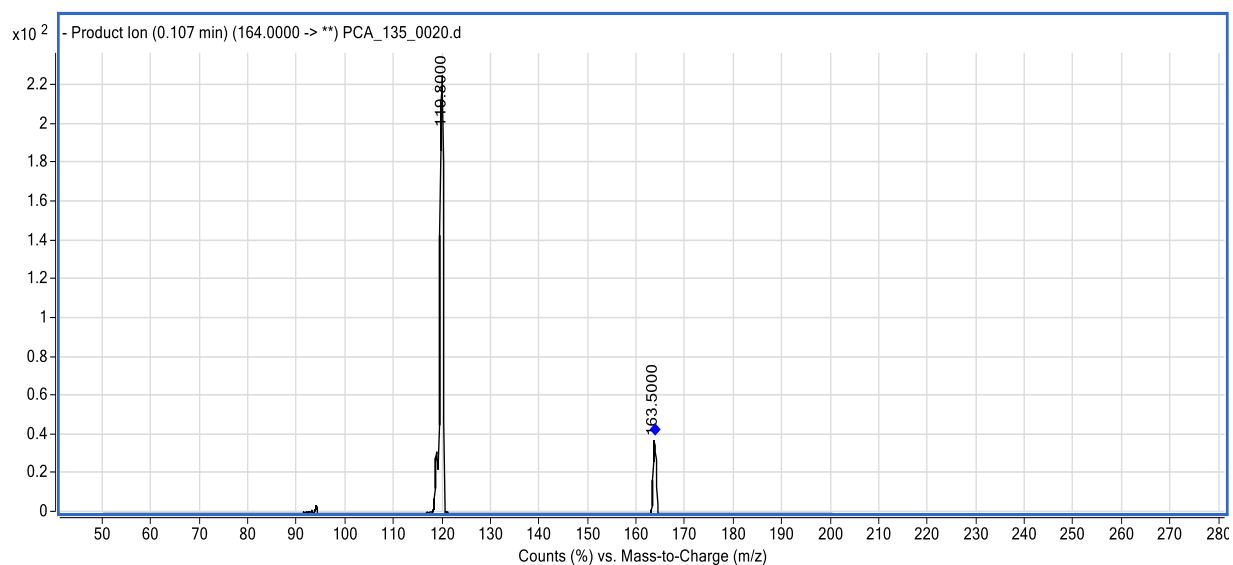

Figure S10. LC MS chromatogram of compound 3b

## 2.3 FITR of compound 3c

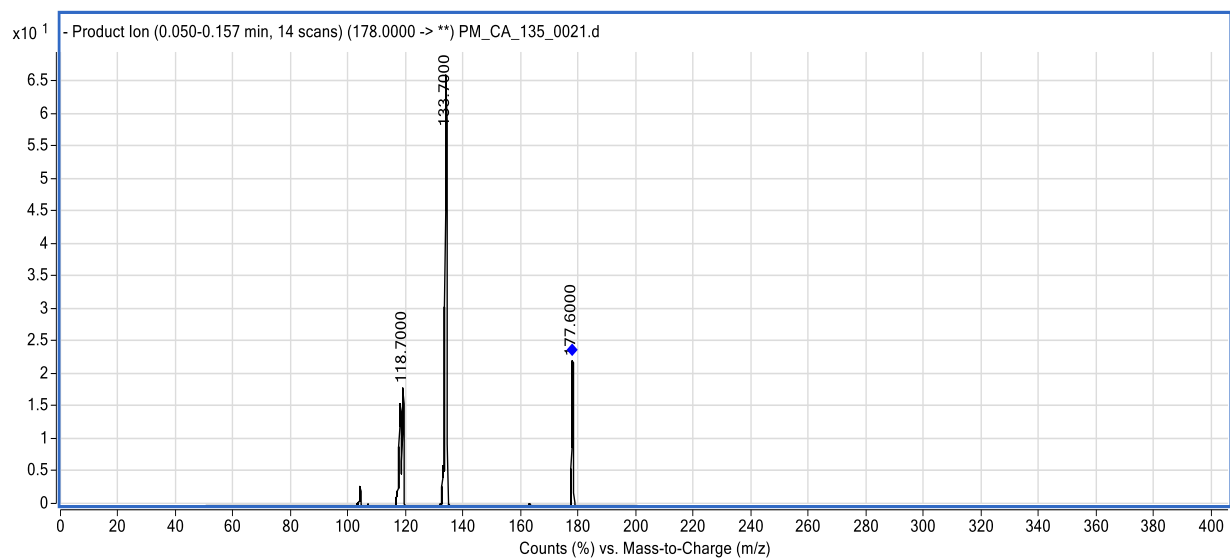

Figure S11. LC MS chromatogram of compound 3c

## 2.4 FITR of compound 3d

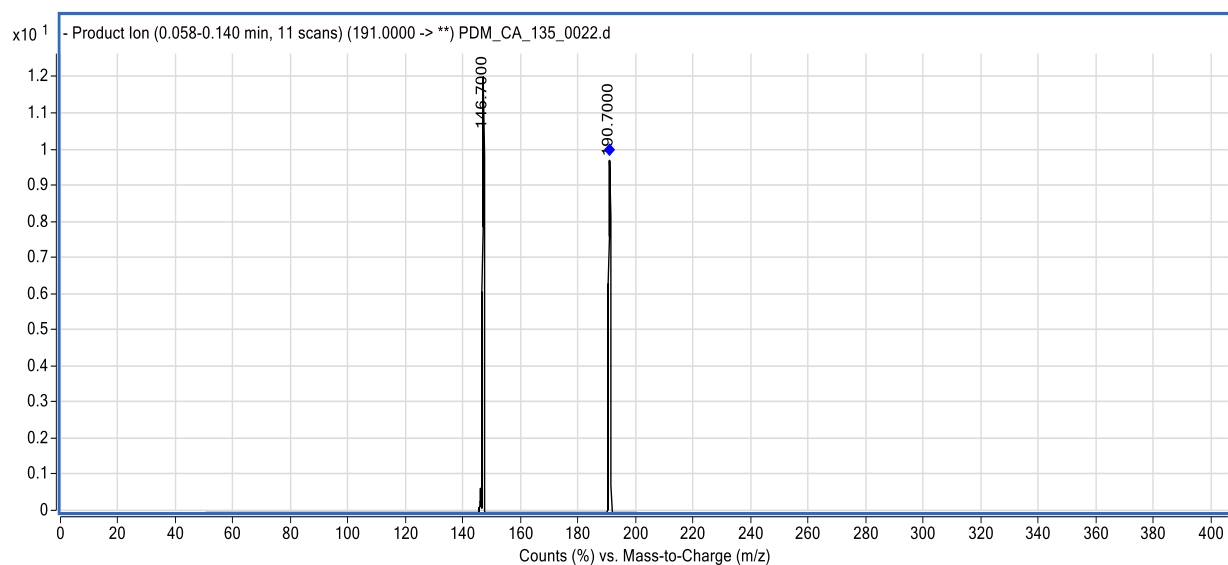

Figure S12. LC MS chromatogram of compound 3d

## 2.5 LC MS of compound 3e

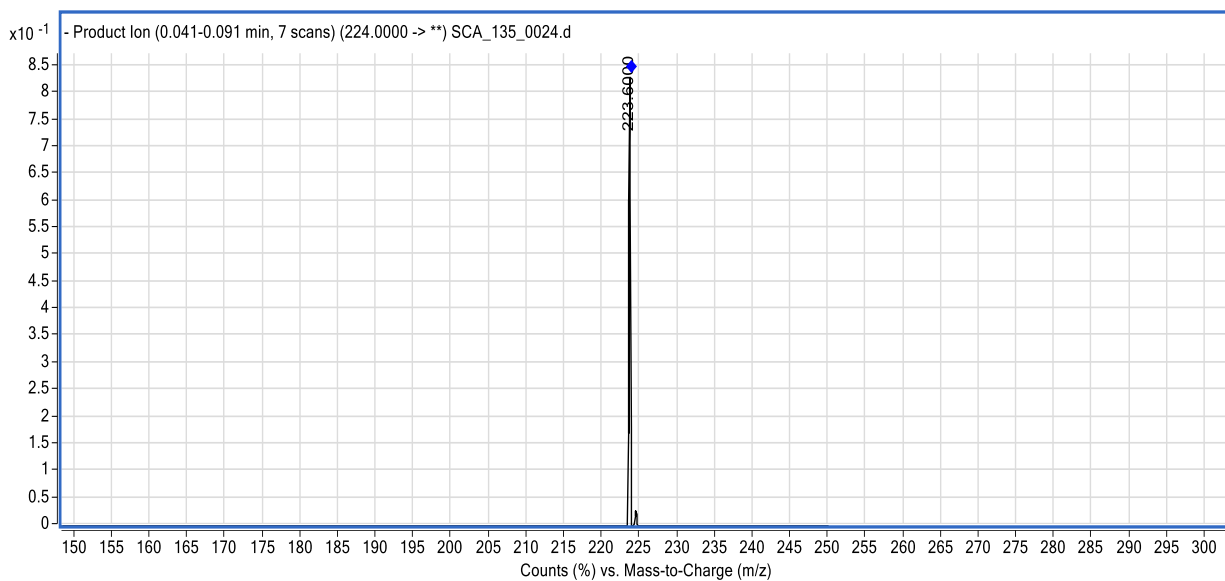

Figure S13. LC MS chromatogram of compound 3e

## 2.6 LC MS of compound 3f

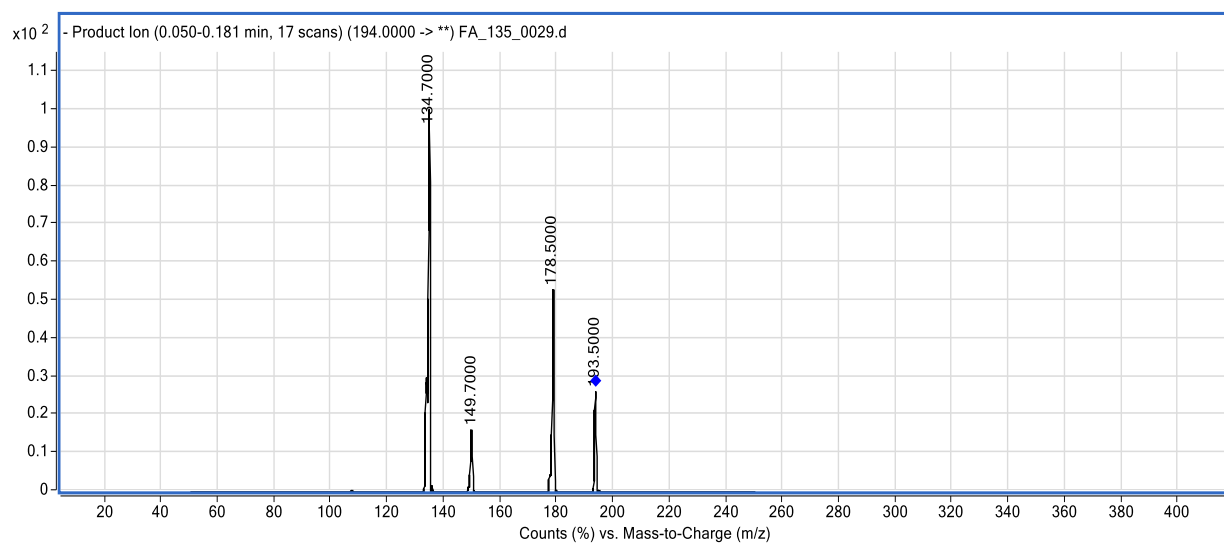

Figure S14. LC MS chromatogram of compound 3f

## 2.7 LC MS of compound 3g

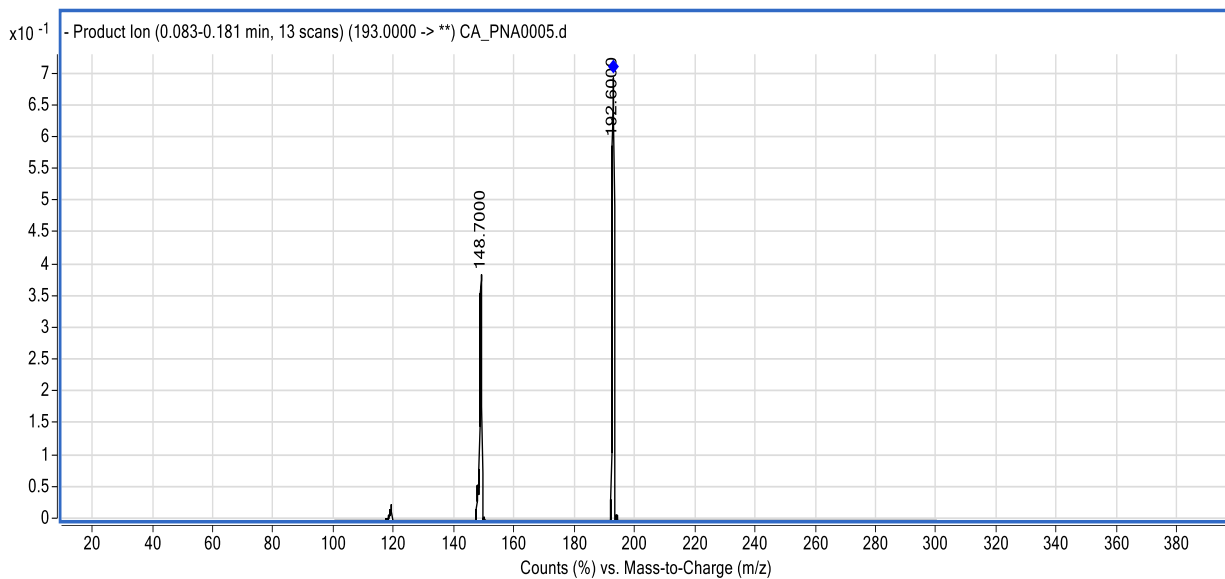

Figure S15. LC MS chromatogram of compound 3g



## 2.8 LC MS of compound 3h

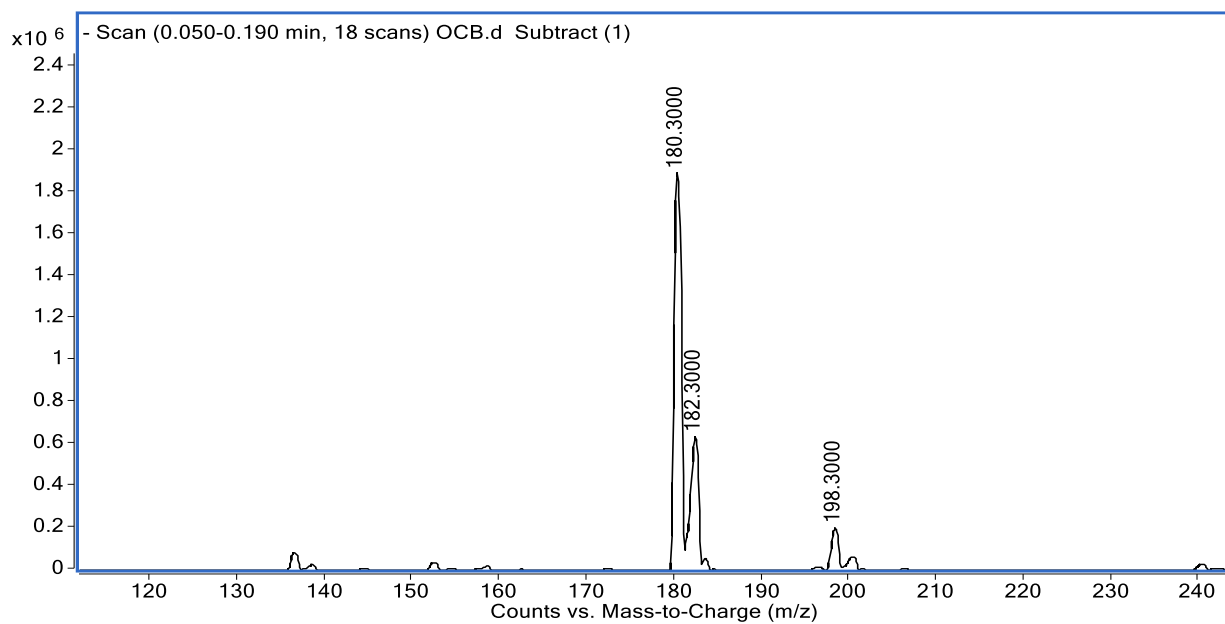

Figure S16. LC MS chromatogram of compound 3h

## 3. $^1\text{H}$ NMR of synthesized compounds

### 3.1 $^1\text{H}$ NMR of compound 3a

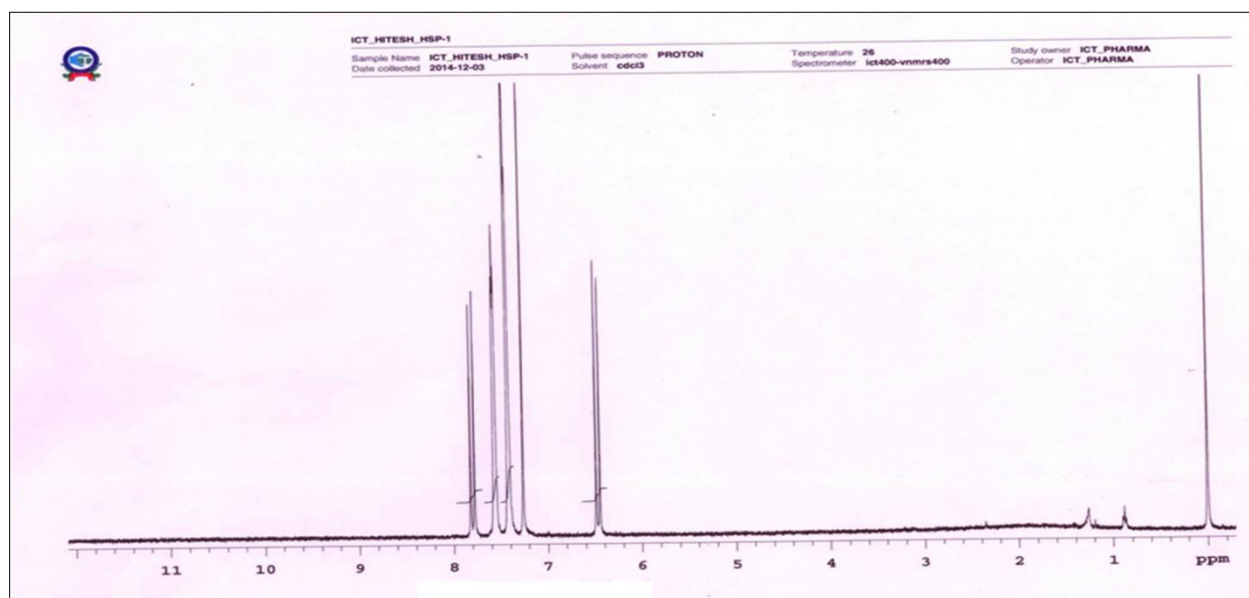

Figure S17.  $^1\text{H}$ NMR of compound 3a

### 3.2 $^1\text{H}$ NMR of compound 3b

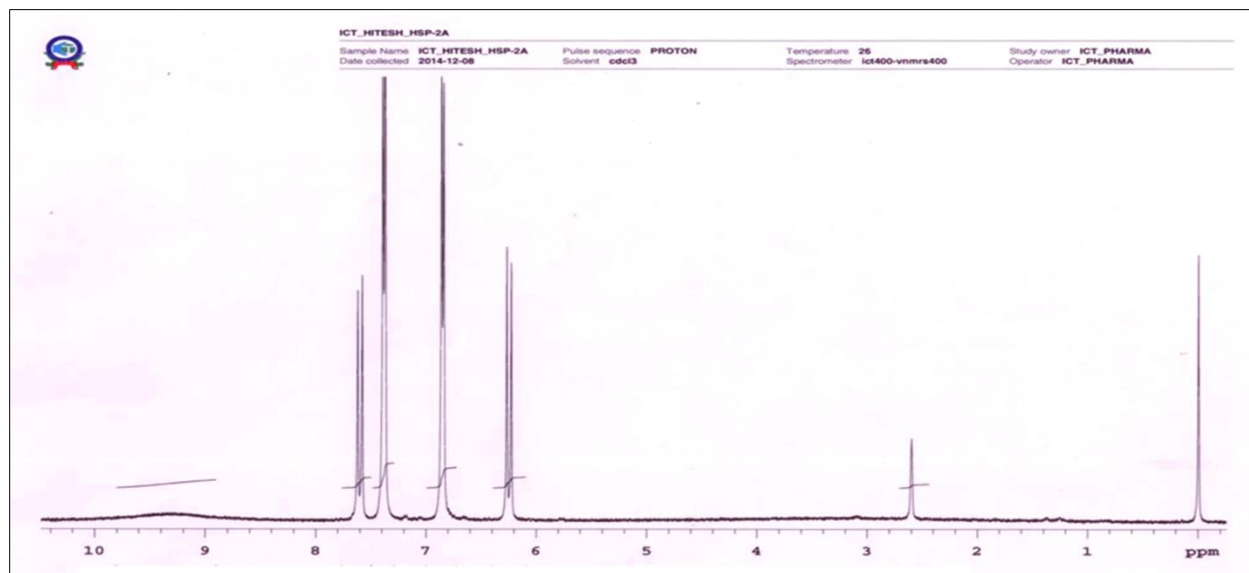

Figure S18.  $^1\text{H}$ NMR of compound 3b

### 3.3 $^1\text{H}$ NMR of compound 3c

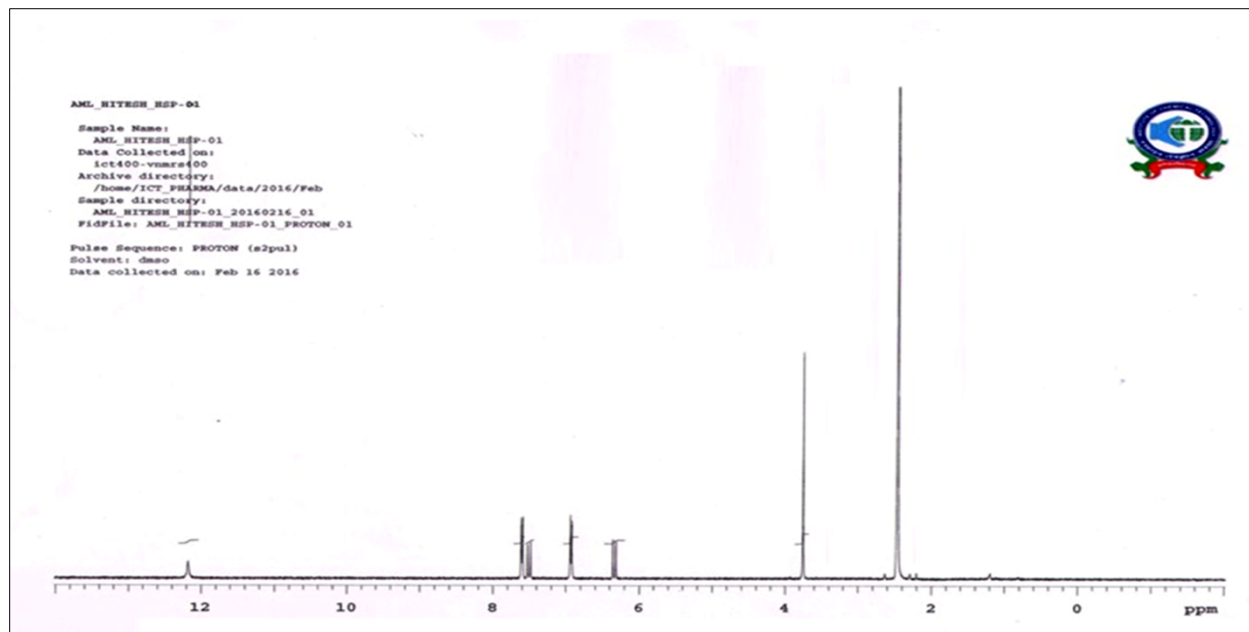

Figure S19.  $^1\text{H}$ NMR of compound 3c

### 3.4 $^1\text{H}$ NMR of compound 3d

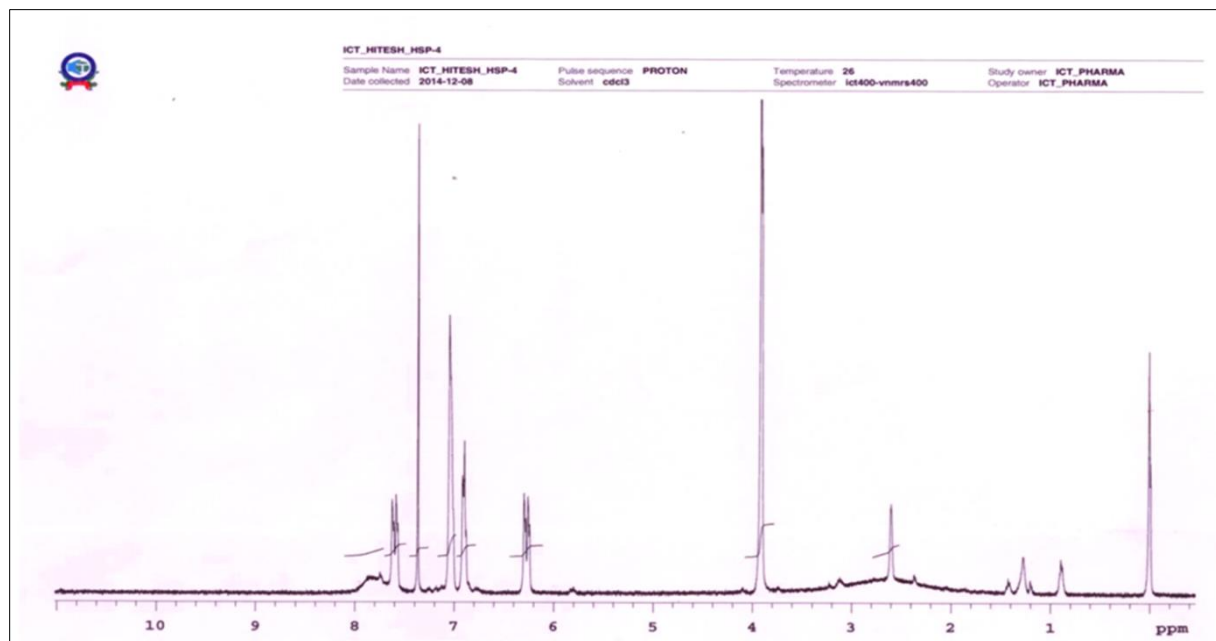

Figure S20.  $^1\text{H}$ NMR of compound 3d

### 3.5 $^1\text{H}$ NMR of compound 3e

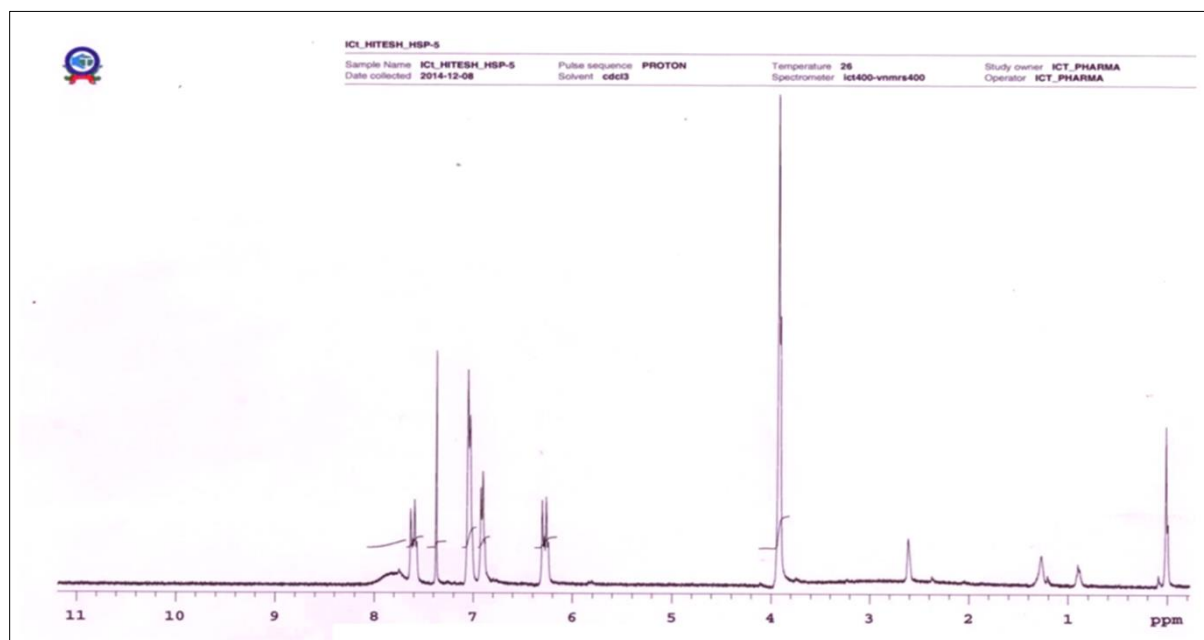

Figure S21.  $^1\text{H}$ NMR of compound 3e

### 3.6 $^1\text{H}$ NMR of compound 3f

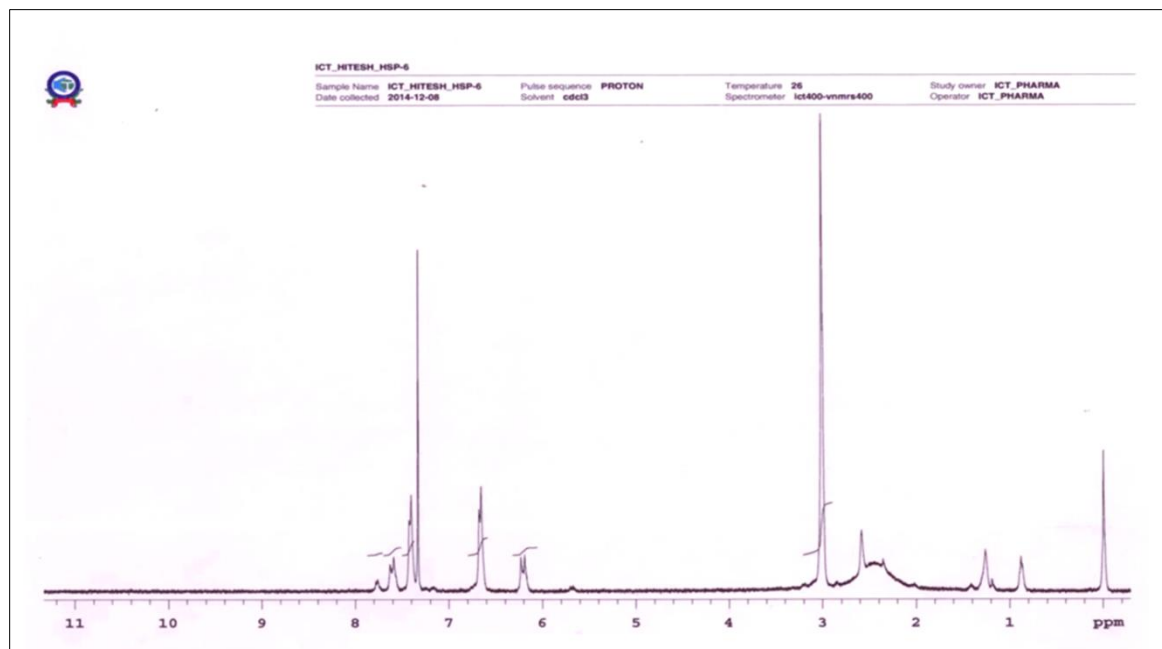

Figure S22.  $^1\text{H}$ NMR of compound 3f

### 3.7 $^1\text{H}$ NMR of compound 3g

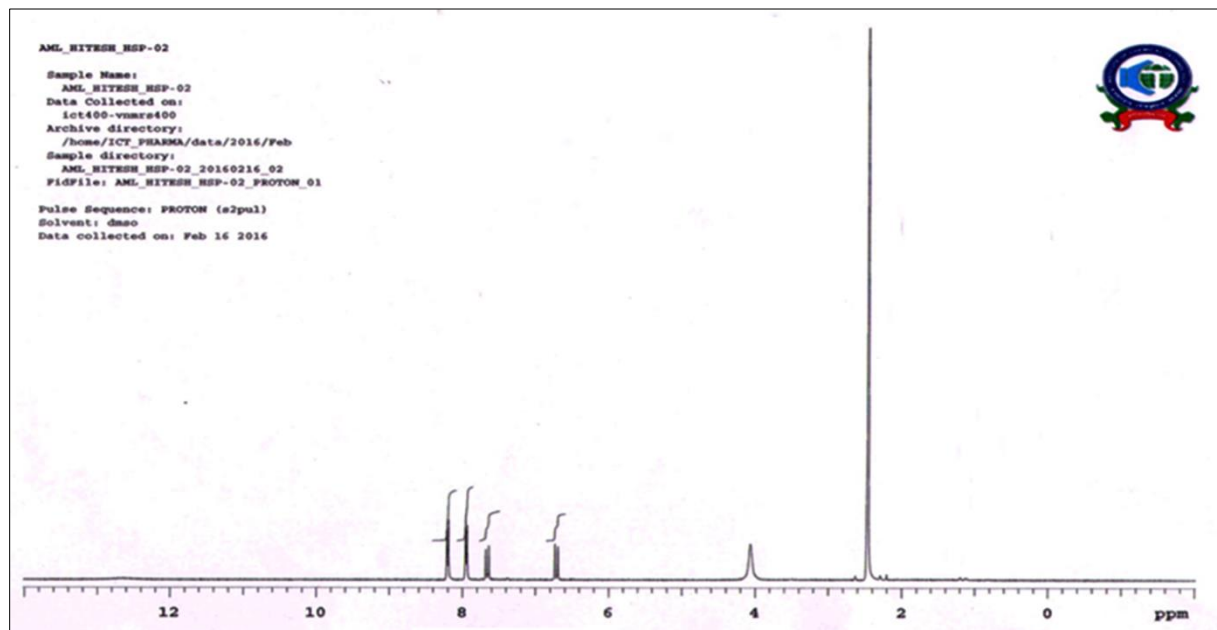

Figure S23.  $^1\text{H}$ NMR of compound 3g

### 3.8 <sup>1</sup>HNMR of compound 3h

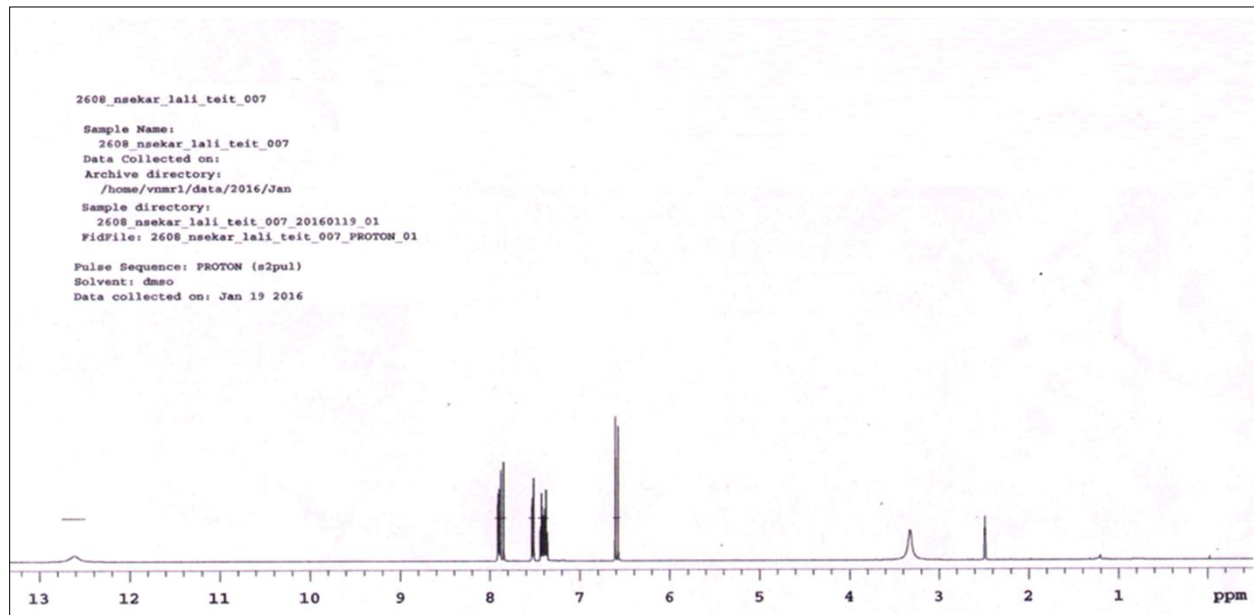

Figure S24. <sup>1</sup>HNMR of compound 3h

## 4. HPLC analysis of synthesized compounds

### 4.1 HPLC chromatogram of compound 3a

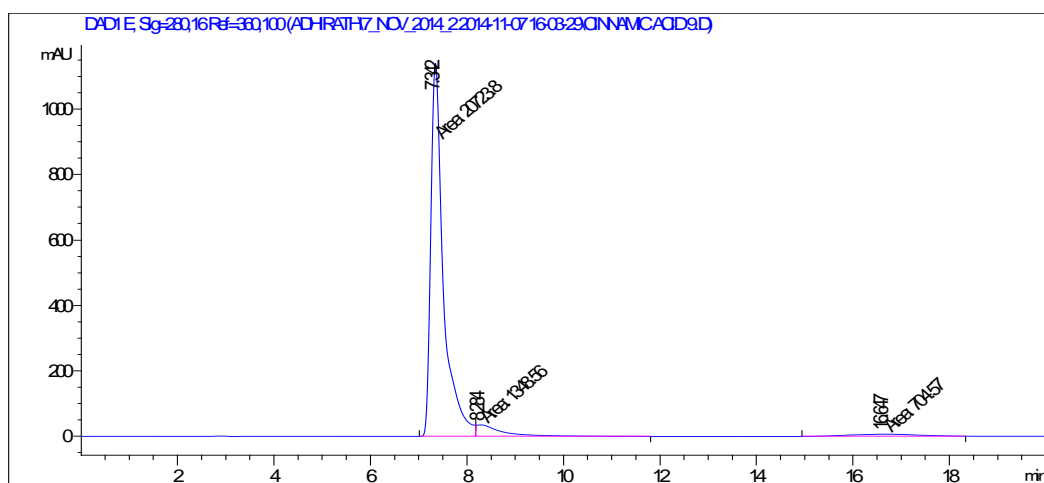

Fig S25. HPLC chromatogram of compound 3a

| Sr.No | Time   | Area    | Height | Width  | Area%  | Symmetry |
|-------|--------|---------|--------|--------|--------|----------|
| 1     | 7.342  | 22072.3 | 1140.9 | 0.3224 | 96.907 | 0.499    |
| 2     | 16.647 | 704.6   | 6.9    | 1.6988 | 3.093  | 0.994    |

#### 4.2 HPLC chromatogram of compound 3b

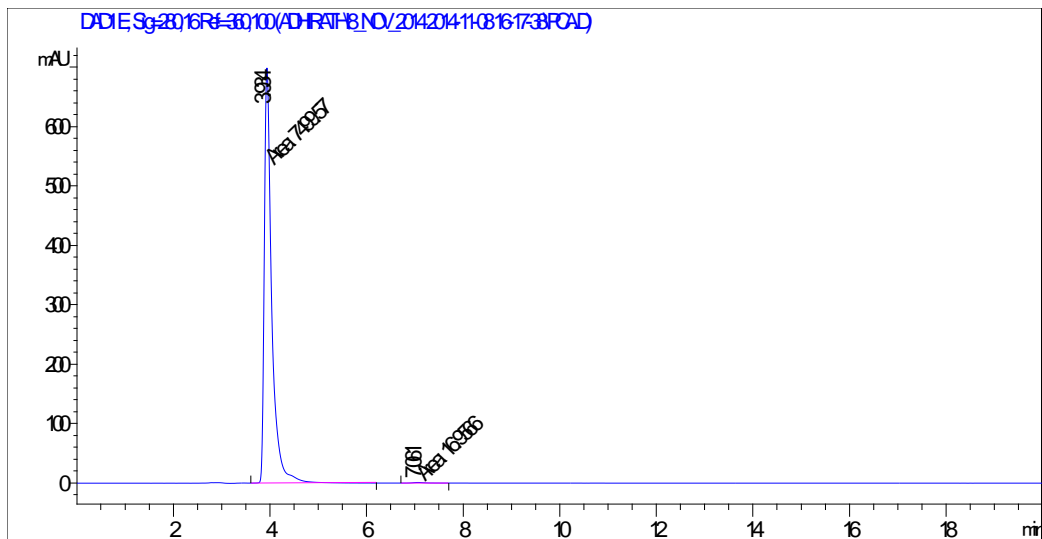

Fig S26. HPLC chromatogram of compound 3b

| Sr.No | Time  | Area   | Height | Width  | Area%  | Symmetry |
|-------|-------|--------|--------|--------|--------|----------|
| 1     | 3.934 | 7499.6 | 699.3  | 0.1787 | 99.774 | 0.516    |
| 2     | 7.061 | 17     | 1      | 0.2727 | 0.226  | 0.716    |

#### 4.3 HPLC chromatogram of compound 3c

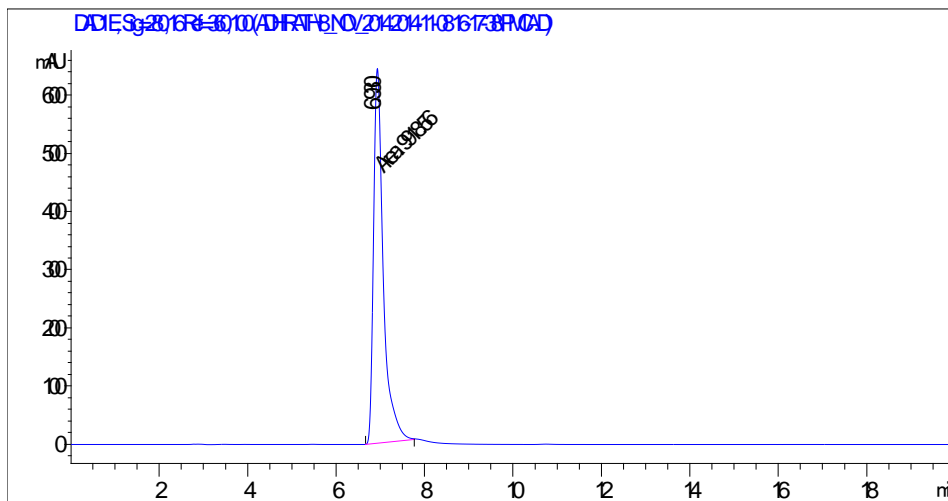

Fig S27. HPLC chromatogram of compound 3c

| Sr.No | Time | Area   | Height | Width  | Area% | Symmetry |
|-------|------|--------|--------|--------|-------|----------|
| 1     | 6.93 | 9918.6 | 645    | 0.2563 | 100   | 0.608    |

#### 4.4 HPLC chromatogram of compound 3d

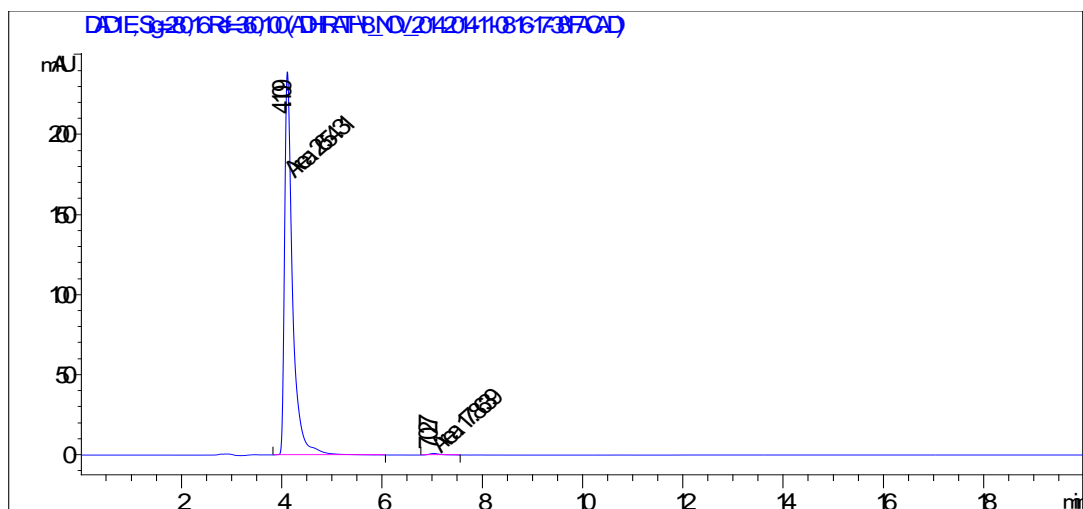

**Fig S28.** HPLC chromatogram of compound 3d

| Sr.No | Time  | Area   | Height | Width  | Area%  | Symmetry |
|-------|-------|--------|--------|--------|--------|----------|
| 1     | 4.109 | 2654.3 | 239.5  | 0.1847 | 99.331 | 0.513    |
| 2     | 7.027 | 17.9   | 1      | 0.2904 | 0.669  | 0.605    |

#### 4.5 HPLC chromatogram of compound 3e

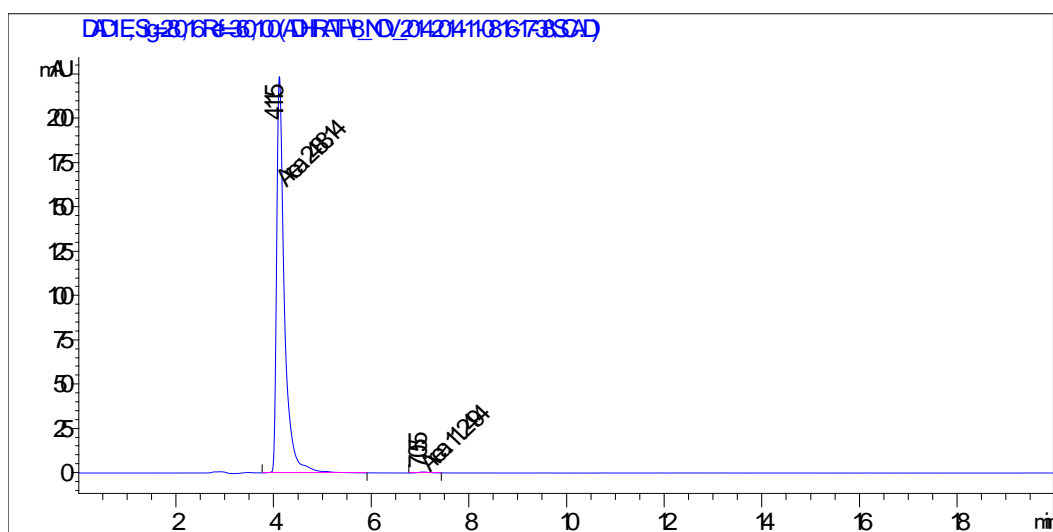

**Fig S29.** HPLC chromatogram of compound 3e

| Sr.No | Time  | Area   | Height   | Width  | Area% | Symmetry |
|-------|-------|--------|----------|--------|-------|----------|
| 1     | 4.115 | 2488.1 | 223.9    | 0.1852 | 99.55 | 0.513    |
| 2     | 7.055 | 11.2   | 6.30E-01 | 0.2976 | 0.45  | 0.785    |

#### 4.6 HPLC chromatogram of compound 3f

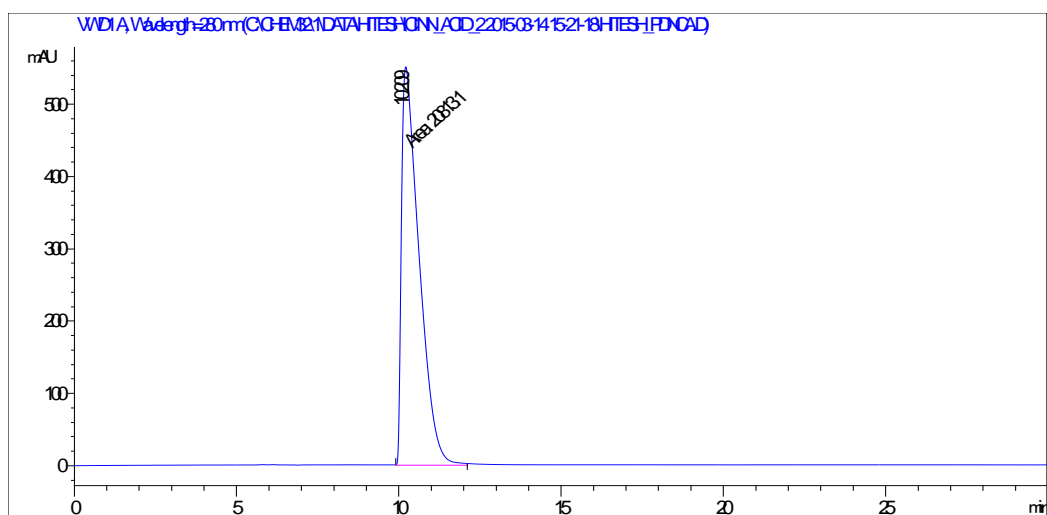

**Fig S30.** HPLC chromatogram of compound 3f

| Sr.No | Time   | Area    | Height | Width  | Area% | Symmetry |
|-------|--------|---------|--------|--------|-------|----------|
| 1     | 10.209 | 20813.1 | 551.3  | 0.6292 | 100   | 0.308    |

#### 4.7 HPLC chromatogram of compound 3g

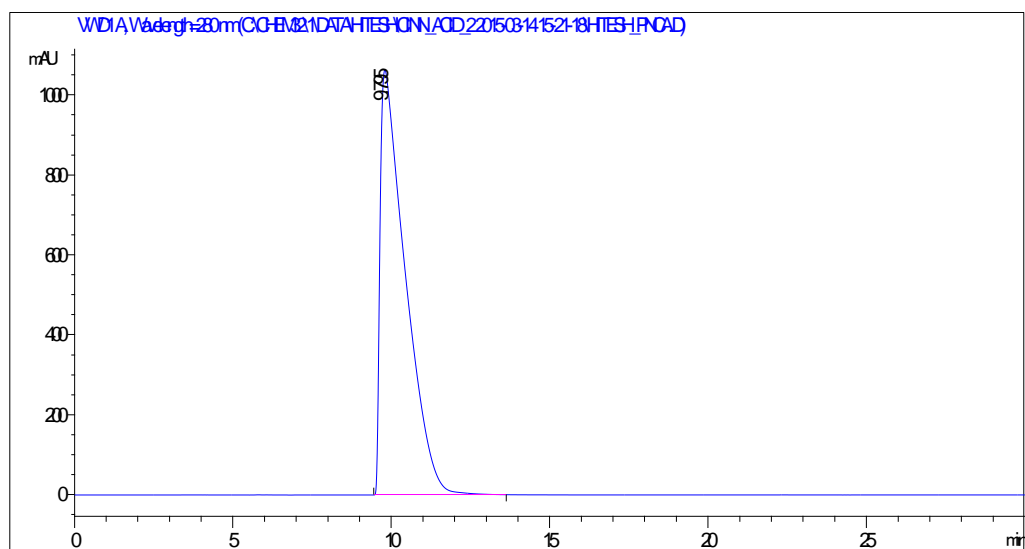

**Fig S31.** HPLC chromatogram of compound 3g

| Sr.No | Time  | Area    | Height | Width  | Area% | Symmetry |
|-------|-------|---------|--------|--------|-------|----------|
| 1     | 9.795 | 58699.2 | 1063.4 | 0.7867 | 100   | 0.215    |

#### 4.8 HPLC chromatogram of compound 3h



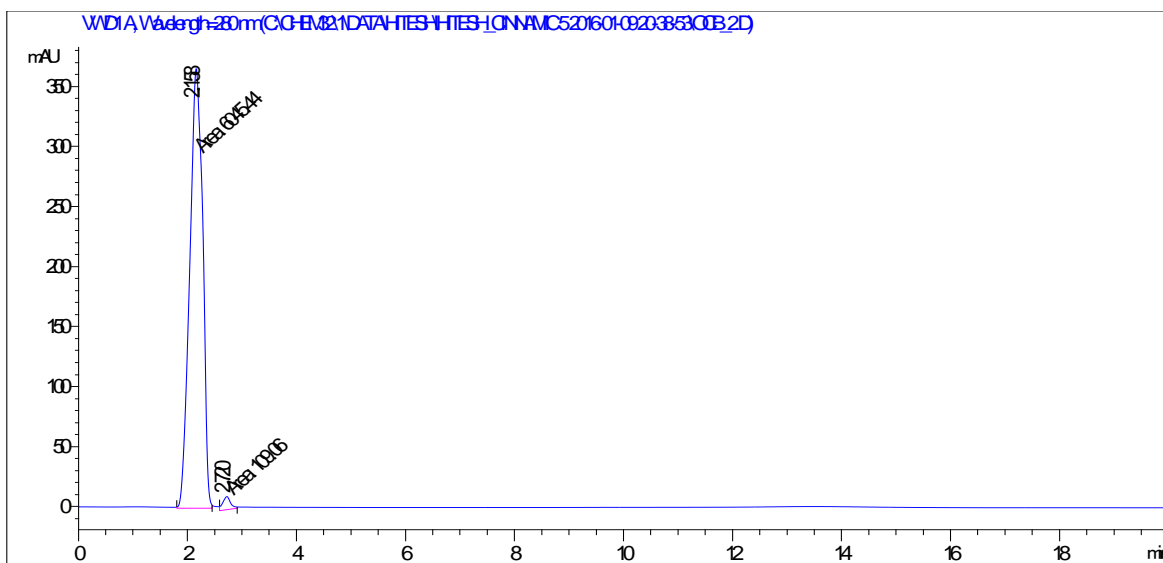

**Fig S32.** HPLC chromatogram of compound 3h

| Sr.No | Time  | Area   | Height | Width  | Area%  | Symmetry |
|-------|-------|--------|--------|--------|--------|----------|
| 1     | 2.158 | 6045.4 | 366.5  | 0.275  | 98.228 | 0.993    |
| 2     | 2.72  | 109.1  | 11     | 0.1654 | 1.772  | 1.048    |
